# Supplementary material
Source: HighWire-hosted journal article supplement (http://www.jneurosci.org/highwire/filestream/597333/field_highwire_adjunct_files/0/Supplementary_Table_1.pdf)
Supplement: Supplementary_Table_1.pdf [file Supplementary_Table_1.pdf]

### Supplementary Table 1

Desensitization time constants and extent for GABA<sub>A</sub> currents (28 sec)

| Free                                      | A1           | $\tau_1$ | A2       | $\tau_2$   | A3           | $\tau_3$ | A4       | $\tau_4$   | S/P       | Cm   | N  |
|-------------------------------------------|--------------|----------|----------|------------|--------------|----------|----------|------------|-----------|------|----|
| ha1 $\beta$ 2 $\gamma$ 2s (wt)            | 16.7<br>±4.5 | 23.6±4.4 | 16.9±4.7 | 299 ± 49.7 | 34.9<br>±7.8 | 2081±322 | 20.1±5.9 | 10341±934  | 14.19±3.5 | 33.4 | 14 |
| ha1 $\beta$ 2 $\gamma$ 2s (het)           | 21.5±4.9     | 19.9±5.5 | 20.2±5.3 | 273.5±56.3 | 29.4±6.9     | 1899±291 | 16.5±4.1 | 9278 ±479  | 10.81±0.5 | 34.5 | 17 |
| ha1 $\beta$ 2 $\gamma$ 2s(hom)            | 27.9±8.5     | 18.3±6.3 | 19.2±4.2 | 269.5±47.1 | 28.8±8.1     | 1912±304 | 15.4±4.5 | 8939 ±532  | 11.43±0.6 | 32.0 | 15 |
| Forced                                    |              |          |          |            |              |          |          |            |           |      |    |
| r $\beta$ 2- $\alpha$ 1/ $\gamma$ 2L(wt)  | 19.2±5.7     | 25.2±2.5 | 17.1±6.3 | 278.7±55.6 | 37.3±7.7     | 2112±361 | 18.6±6.2 | 11578±776  | 15.43±1.2 | 29.5 | 9  |
| r $\beta$ 2- $\alpha$ 1/ $\gamma$ 2L(het) | 24.4±5.3     | 22.1±6.1 | 19.4±5.5 | 264.4±47.5 | 32.9±7.2     | 1997±317 | 12.2±5.3 | 10983±906  | 11.87±1.5 | 27.7 | 13 |
| r $\beta$ 2 $\alpha$ 1/ $\gamma$ 2L(hom)  | 25.1±7.1     | 19.9±5.2 | 17.8±3.9 | 261.9±63.2 | 34.9±9.9     | 1683±294 | 11.4±4.9 | 9876 ± 994 | 12.91±1.2 | 27.4 | 16 |

Data in this table are expressed as mean ± SEM. The relative contributions (A1, A2, A3 and A4) are in % and desensitization time constants ( $\tau_1$ ,  $\tau_2$ ,  $\tau_3$  and  $\tau_4$ ) are in msec. S/P is the percent of steady state current/peak. Cm is the cell membrane capacitance (pF). With free assembly (Free) and forced assembly (Forced) experimental groups, all statistical comparisons were made between wt and het, wt and hom, and het and hom groups. Statistical significance was taken as  $p < 0.05$ . None of these comparisons were statistically significant. The statistical comparisons were made in GraphPad Prism by using unpaired Student's t tests.
